# Supplementary material for: Coculture with hemicellulose-fermenting microbes reverses inhibition of corn fiber solubilization by Clostridium thermocellum at elevated solids loadings
Source: Springer Nature journal article supplement (doi:10.1186/s13068-020-01867-w), 2021-01-18
Supplement: MOESM1 [file 13068_2020_1867_MOESM1_ESM.pdf]

## Additional File 1, Supplementary Figures and Tables

Beri et al., Coculture with hemicellulose-fermenting microbes reverses inhibition of corn fiber solubilization by *Clostridium thermocellum* at elevated solids loadings

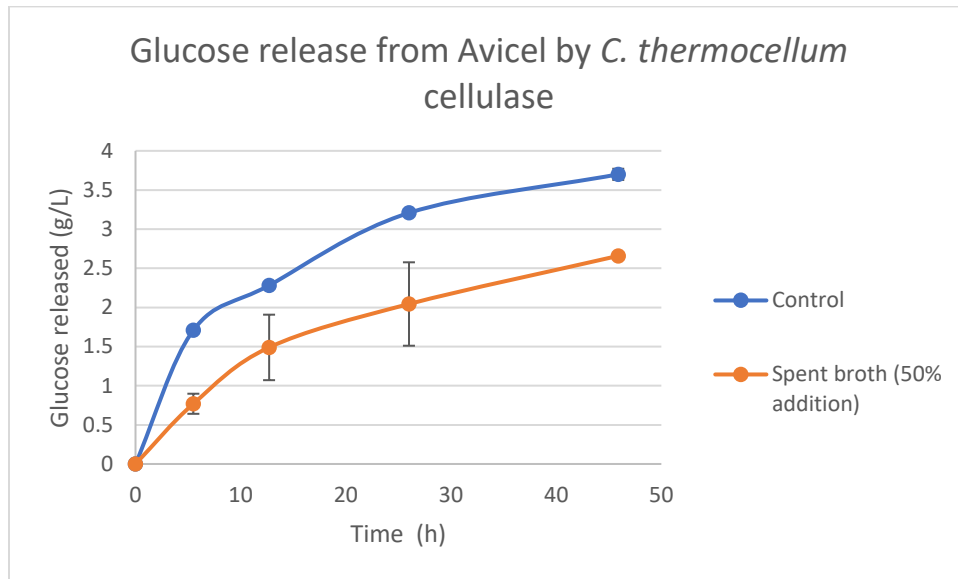

**Figure S1- Timecourse of glucose release from Avicel for cellulase assay with the addition of spent broth-** 20 mg (cellulase)/g (Avicel) was incubated with 6 g/L Avicel for 50 h. Regular samples were taken to measure the release of glucose by liquid QS.

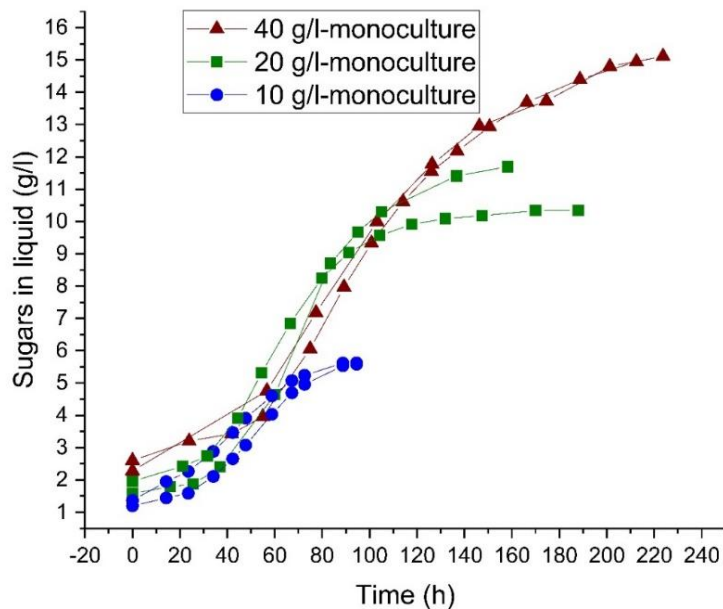

**Figure S2- Total sugars in fermentation broth from *C. thermocellum* monoculture reactors on corn fiber, measured by liquid QS.**

| Monosaccharides | Disaccharides | Oligosaccharides  | Polysaccharides |
|-----------------|---------------|-------------------|-----------------|
| D-Xylose        | Sucrose       | XOS               | Pullulan        |
| Arabinose       | Xylobiose     | Xyloglucan        | Inulin          |
| Glucose         | Mannobiose    | Glucomannan       | Arabinan        |
| Fructose        | Maltose       | Galactomannan     | Wheat AX        |
| D-Galactose     | Melibiose     | Stachyose         |                 |
| L-xylose        |               | A <sup>3</sup> X  |                 |
| L-Rhamnose      |               | A <sup>2</sup> XX |                 |
| D-ribose        |               | Xylotriose        |                 |
| L-sorbose       |               | Xylotetraose      |                 |

**Table S1- List of carbohydrates tested for effect on growth rate of *C. thermocellum* on cellobiose.** XOS- Xylooligosaccharides, AX- arabinoxylan, A<sup>3</sup>X- 3<sup>2</sup>- $\alpha$ -L-Arabinofuranosyl-xylobiose, A<sup>2</sup>XX- 2<sup>3</sup>- $\alpha$ -L-Arabinofuranosyl-xylotriose

|               |                                                                                                                                                                                                                                                                                                         |
|---------------|---------------------------------------------------------------------------------------------------------------------------------------------------------------------------------------------------------------------------------------------------------------------------------------------------------|
| Sigma-Aldrich | D-Xylose, L-Xylose, Glucose, Fructose, D-galactose, Sucrose, Xylan from Birchwood                                                                                                                                                                                                                       |
| Megazyme      | Mannobiose, Glucomannan (Konjac;Low Vis), A <sup>3</sup> X- 3 <sup>2</sup> - $\alpha$ -L-Arabinofuranosyl-xylobiose, A2XX- 2 <sup>3</sup> - $\alpha$ -L-Arabinofuranosyl-xylotriose, Wheat Arabinoxylan (Wheat Flour; Insoluble), Xylotriose, Xylotetraose, Arabinan (Sugar Beet), Xylan from Beechwood |
| Carbosynth    | L-Rhamnose monohydrate, L-Sorbose, Xylobiose, D-Maltose monohydrate, D-Melibiose monohydrate, Inulin, Xyloglucan, Pullulan, D-Galacto-D-mannan- from carob, Stachyose hydrate                                                                                                                           |
| TCI America   | Xylan from corn core                                                                                                                                                                                                                                                                                    |

**Table S2- Sources of carbohydrates used in the study**

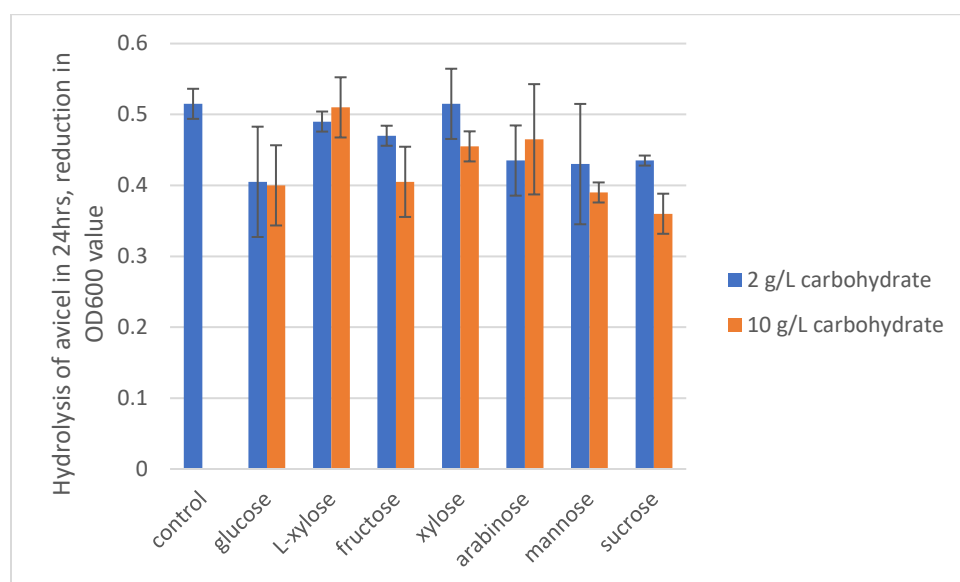

**Figure S3- Effect of different monosaccharides on *C. thermocellum* cellulase activity** - 1 g/L initial Avicel was incubated with 10 mg/g *C. thermocellum* cellulase enzyme and activity was estimated by measuring the decrease in OD<sub>600</sub> after 24h. Carbohydrates were added at two different concentrations of 2 g/L and 10 g/L. The error bars show the SD for n=2.

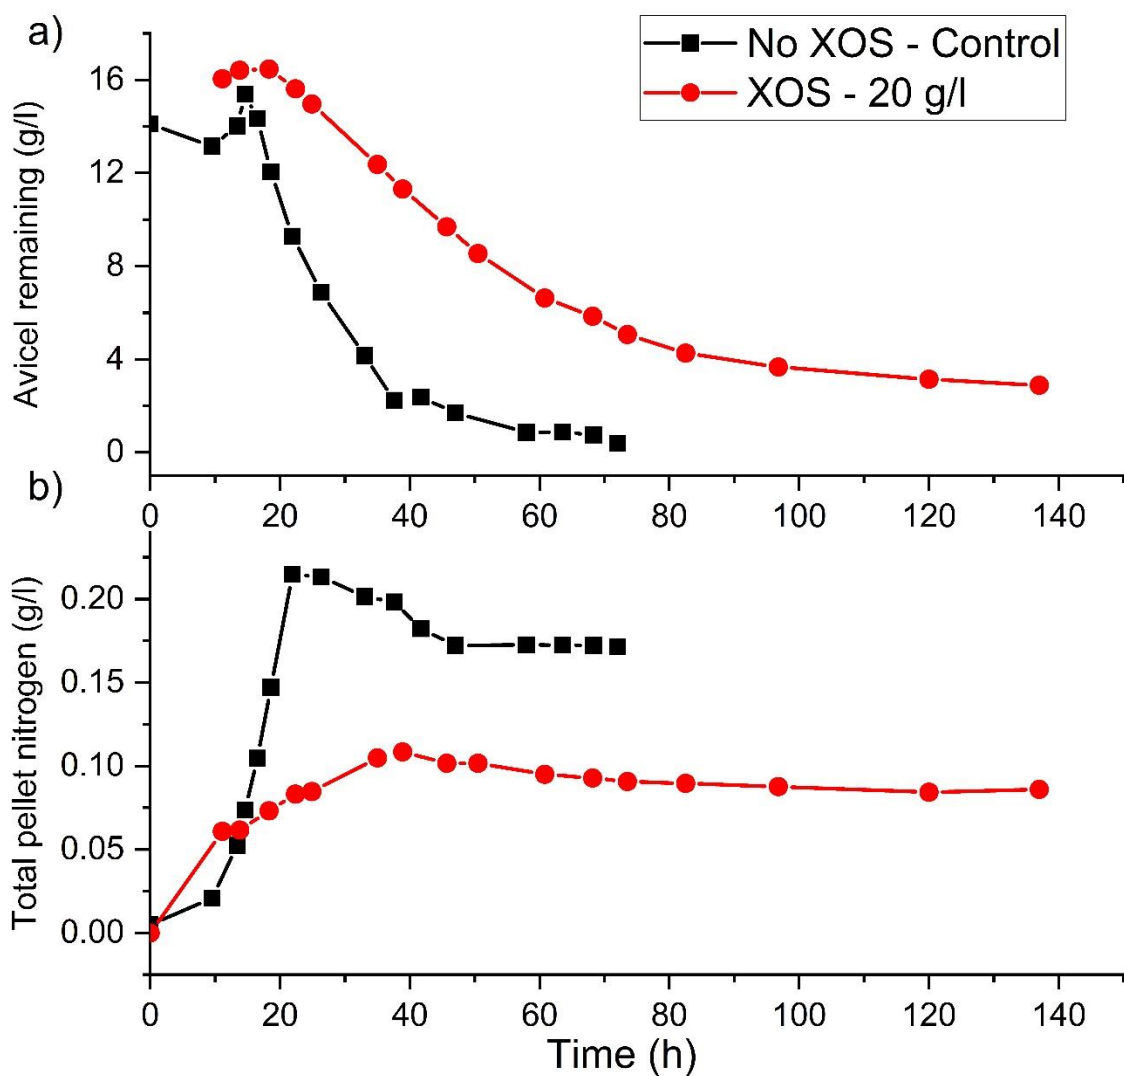

**Figure S4- Effect of adding Xylooligosaccharides to *C. thermocellum* Avicel fermentations in bioreactors.** Fermentation data from two pH controlled fermentors showing a) Avicel remaining and b) total pellet nitrogen for *C. thermocellum* growth on 20 g/l Avicel with and without the addition of 20 g/l XOS.

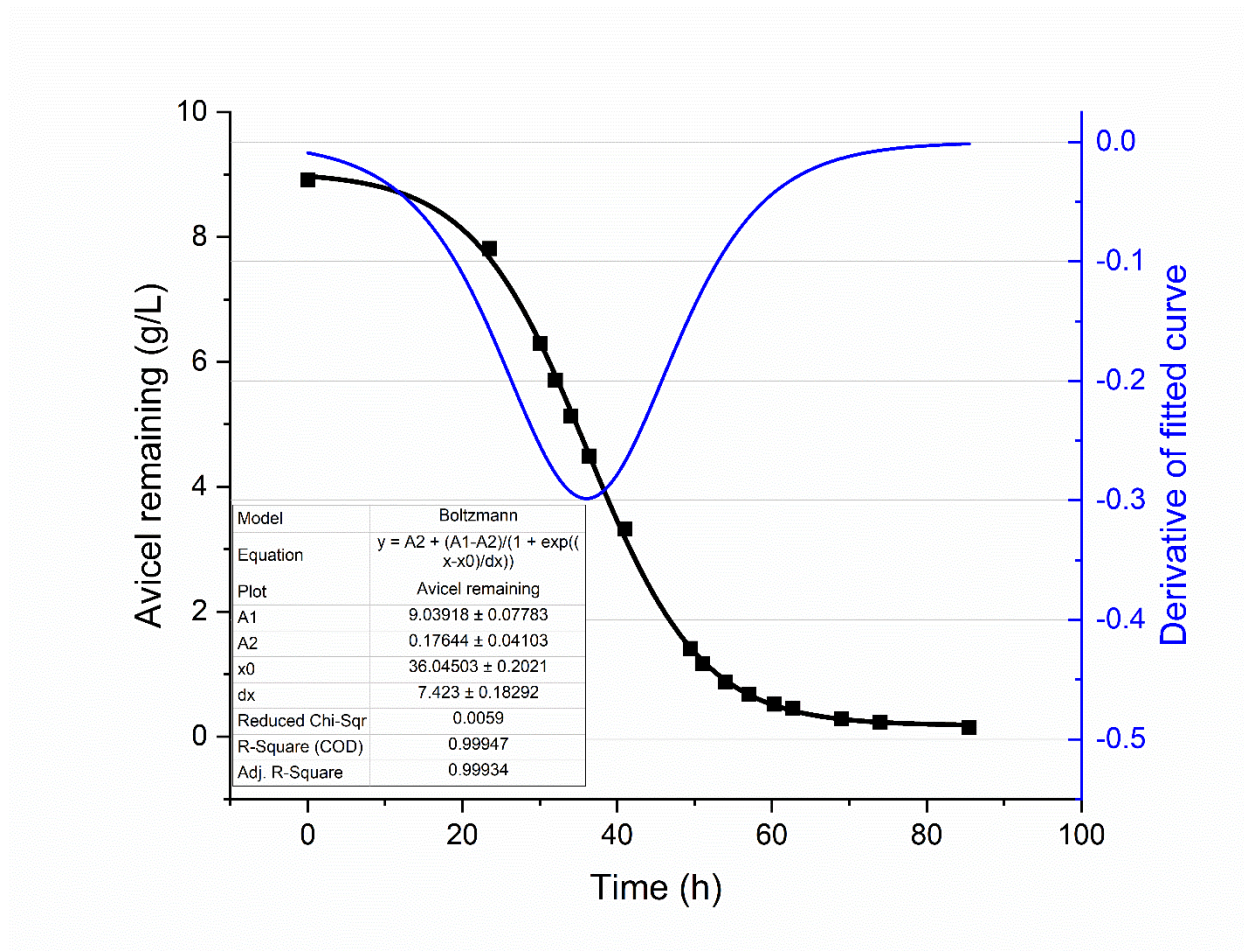

**Figure S5- Curve fitting to measure the effect of various carbohydrates on the utilization of Avicel by *C. thermocellum*.** Substrate utilization by *C. thermocellum* at 10 g/l Avicel loading was measured using a total carbon and nitrogen (TCN) analyzer. Curves were generated with Boltzmann Sigmoidal fitting and the derivative taken to calculate maximum rate of Avicel utilization. Figure 6 in the main text shows calculated rates with the addition of various carbohydrates at a 10 g/l concentration. The data for one of the control replicates is shown here, and the rest of the data are provided in Additional file 2.

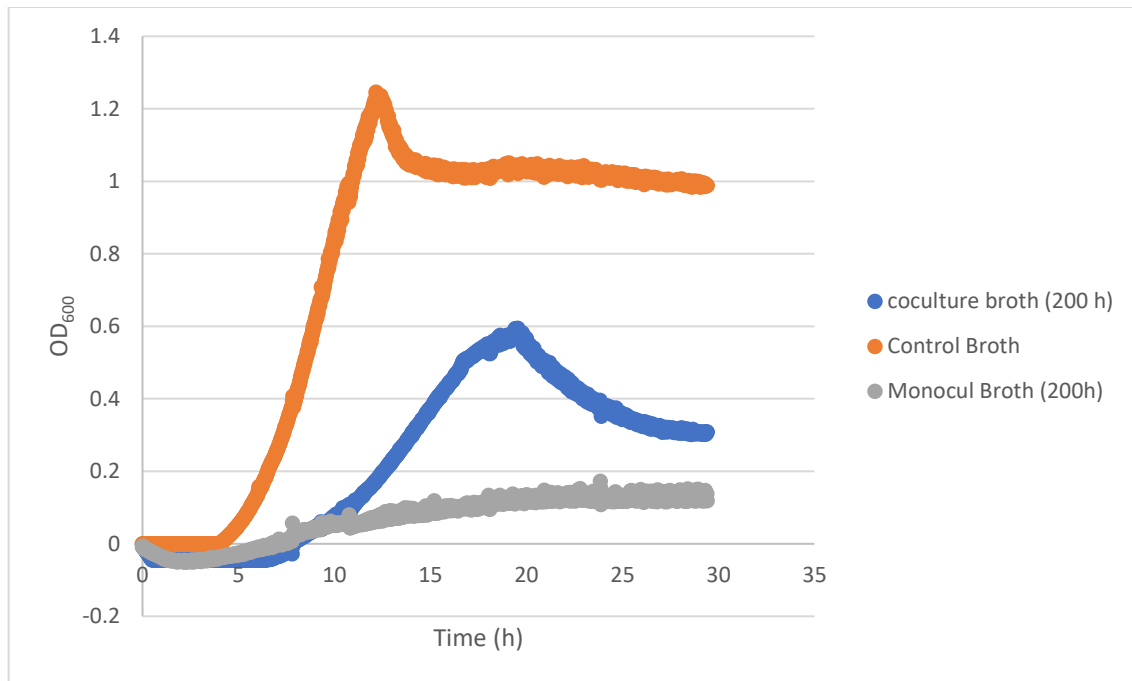

**Figure S6- Effect of final spent broth from a corn fiber coculture fermentation on growth of *C. thermocellum* on cellobiose in a plate reader.**
